# Supplementary material
Source: publisher figshare collection journal article supplement (https://tandf.figshare.com/ndownloader/files/12525473)

**Table S1**: List of PDB structures selected for EGFR (T790M) along with their resolution.

| **PDB ID** | **Resolution** |
| --- | --- |
| 5HG7 | 1.85 Å |
| 3W2P | 2.05 Å |
| 3W2R | 2.05 Å |
| 4I24 | 1.8 Å |
| 5HG5 | 1.52 Å |
| 5HG8 | 1.42 Å |

**Table S2**: List of PDB structures selected for cMET along with their resolution.

| **PDB ID** | **Resolution** |
| --- | --- |
| 2WGJ | 2.0 Å |
| 3CCN | 1.9 Å |
| 3CD8 | 2.0 Å |
| 3DKF | 1.8 Å |
| 3DKG | 1.91 Å |
| 3I5N | 2.0 Å |
| 3QTI | 2.0 Å |
| 3U6H | 2.0 Å |
| 5EYD | 1.85 Å |
| 1R0P | 1.7 Å |
| 3F66 | 1.4 Å |

**Table S3:** RMSD values obtained after Cross-docking for the selection of PDB for EGFR (T790M)

| PDB ID | 5HG7 | 5HG8 | 3W2P | 3W2R | 4I24 | 5HG5 |
| --- | --- | --- | --- | --- | --- | --- |
| Ligand |
| 5HG7 | - | - | 7.03 | - | 13.69 | - |
| 5HG8 | 15.85 | - | - | 16.8 | - | - |
| 3W2P | 9.35 | - | 1.49 | - | 8.31 | - |
| 3W2R | - | - | - | 6.304 | - | - |
| 4I24 | 7.94 | - | 5.68 | - | 0.93 | - |
| 5HG5 | - | - | - | - | - | - |
| Average | 11.04 | - | 4.73 | 10.20 | 7.64 | - |

* average RMSD value showed best fitting for PDB ID:3W2P, which is selected for further study.

**Table S4:** RMSD values obtained after Cross-docking for the selection of PDB for cMET

| PDB ID | 2WGJ | 3CCN | 3CD8 | 3DKF | 3DKG | 3F66 | 3I5N | 3QTI | 3U6H | 5EYD | 1R0P |
| --- | --- | --- | --- | --- | --- | --- | --- | --- | --- | --- | --- |
| Ligand |
| 2WGJ | 0.77 | 8.2 | 0.89 | 1.08 | 1.51 | - | 0.84 | 2.42 | 11.37 | 0.84 | 9.09 |
| 3CCN | 1.02 | 0.61 | 5.71 | 0.52 | 0.95 | - | 1.37 | 0.47 | 6.91 | 1.59 | 3.11 |
| 3CD8 | 0.90 | 5.79 | 1.83 | 0.68 | 2.31 | 7.27 | 0.62 | 0.79 | 6.71 | 0.63 | 5.99 |
| 3DKF | 7.5 | 7.64 | 5.60 | 4.82 | 5.76 | 5.37 | 7.78 | 6.64 | 8.13 | 5.70 | 9.66 |
| 3DKG | 4.03 | 5.29 | 7.27 | 5.25 | - | 2.67 | 8.74 | 7.21 | - | 6.88 | 9.11 |
| 3F66 | 10.35 | 9.00 | 7.71 | 3.98 | 6.07 | - | 7.67 | 8.25 | 12.07 | 7.66 | 11.49 |
| 3I5N | 2.95 | 2.39 | 0.83 | 0.88 | 1.81 | - | 0.60 | 5.66 | 7.29 | 3.88 | 5.89 |
| 3QTI | - | - | 7.06 | - | 7.16 | - | - | - | 7.99 | 10.72 | - |
| 3U6H | 10.49 | - | 11.48 | 10.7 | 10.99 | - | 11.86 | 13.27 | 1.92 | 15.19 | 15.91 |
| 5EYD | 0.89 | 0.83 | 0.96 | 0.94 | 1.40 | - | 0.96 | 0.86 | 7.82 | 0.61 | 7.35 |
| 1R0P | 5.70 | 8.26 | 3.47 | 4.49 | 4.07 | - | 5.84 | 5.85 | 6.01 | 5.90 | 0.26 |
| Average | 4.46 | 4.51 | 4.61 | 3.33 | 4.20 | - | 4.62 | 5.12 | 7.62 | 5.42 | 7.78 |

* average RMSD value showed best fitting for PDB ID:3DKF, which is selected for further study.

**Spectral data:**

### Spectral information:

### ((Z)-2-(1-((4-(4-bromophenyl)-6-(4-chlorophenyl)pyrimidin-2-yl)imino)ethyl)phenol (5a) Cream white solid, Yield: 33.4%, mp: 175-177oC, Rf 0.41, IR (ν cm-1) 3467 (OH), 2919 (=C-H), 1660 (C=N), 1633 (C=N), 1590 (C=N), 797 (C-Br), 1H NMR (400 MHz, CDCl3) δ (ppm): 8.21 (s, OH), 8.07-8.05 (m, 2H), 8.00-7.97 (m, 3H), 7.93-7.91 (dd, J13 = 6.8 Hz, J12 = 1.6 Hz, 1H), 7.73 (s, 1H), 7.67-7.65 (m, 2H), 7.63-7.61 (d, J = 7.6 Hz, 1H), 7.51-7.49 (m, 2H), 7.47-7.45 (dd, J13 = 6.8 Hz, J = 1.6 Hz, 1H), 2.7 (s, 3H); 13C NMR (100 MHz, CDCl3) 169.55, 164.09, 164.02, 158.07, 148.57, 136.15, 135.39, 134.98, 131.64, 129.19, 128.97, 128.70, 124.97, 106.93, 25.05; MS (+ESI): m/z 480.23 (M+H)+

### (Z)-N-benzylidene-4-(4-bromophenyl)-6-(4-chlorophenyl)pyrimidin-2-amine (5b) Light Yellow solid, yield: 40.6%, mp: 170-172oC, Rf 0.45, IR (ν cm-1) 3064 (=C-H), 1665 (C=N), 1638 (C=N), 1592 (C=N), 783 (C-Br), 1H NMR (400 MHz, CDCl3) δ (ppm): 8.01-7.99 (m, 1H), 7.95-7.93 (dd, J13 = 6.4 Hz J12 = 1.6 Hz, 1H), 7.64-7.62 (d, J = 8Hz, 1H), 7.48-7.46 (m, 2H), 7.39 (s, 1H), 7.32-7.29 (m, 4H), 7.26-7.24 (m, 1H), 7.15-7.13 (d, J = 7.2 Hz, 4H); 13C NMR (100 MHz, CDCl3) δ (ppm): 169.52, 164.11, 164.05, 158.08, 136.16, 135.41, 135.01, 131.63, 129.19, 128.97, 128.69, 124.96, 106.23; MS (+ESI): m/z 450.86 (M+H)+

### (Z)-N-(1-(4-aminophenyl)ethylidene)-4-(4-bromophenyl)-6-(4-chlorophenyl)pyrimidin-2-amine (5c) light brown solid, yield: 34.1%, mp: 175-177oC, Rf 0.40, IR (ν cm-1) 3306 (NH2), 3019 (=C-H), 1672 (C=N), 1642 (C=N), 1596 (C=N), 787 (C-Br), 1H NMR (400 MHz, CDCl3) δ (ppm) 8.07-8.05 (m, 2H), 8.00-7.98 (m, 3H), 7.93-7.91 (d, J = 8Hz, 1H), 7.74 (s, 1H), 7.68-7.66 (dd, J13 = 7.2 Hz , J12 = 1.6 Hz, 2H), 7.63-7.61 (d, J = 8Hz, 1H), 7.52-7.50 (m, 2H), 7.47-7.45 (d, J = 8Hz, 1H); 13C NMR (100 MHz, CDCl3) δ (ppm) 169.09, 164.17, 164.11, 158.03, 136.28, 135.35, 134.92, 131.51, 128.95, 128.73, 128.58, 124.96, 106.77, 25.04; MS (+ESI): m/z 479.21 (M+H)+

### (Z)-4-(((4-(4-bromophenyl)-6-(4-chlorophenyl)pyrimidin-2-yl)imino)methyl)phenol (5d) Off-white solid, yield: 45.8%, mp: 185-187oC, Rf 0.48, IR (ν cm-1) 3309 (OH), 2954 (=C-H), 1661 (C=N), 1632 (C=N), 1590 (C=N), 797 (C-Br), 785 (C-Cl), 1H NMR (400 MHz, CDCl3) δ (ppm): 10.29 (s, OH), 8.28-8.26 (d, J = 8 Hz, 2H), 8.21-8.19 (d, J = 8 Hz, 2H), 8.08 (s, 1H), 7.95-7.91 (m, 4H), 7.69-7.67 (d, J = 8 Hz, 2H), 7.53-7.51 (m, 3H); 13C NMR (100 MHz, CDCl3) 169.58, 164.10, 164.04, 158.07, 148.77, 136.18, 135.39, 134.98, 131.59, 129.13, 128.91, 128.65, 124.95, 106.88; MS (+ESI): m/z 468.01 (M+H)+

### (Z)-4-(1-((4-(4-bromophenyl)-6-(4-chlorophenyl)pyrimidin-2-yl)imino)ethyl)benzene-1,3-diol (5e) Off-white solid, yield: 35.8%, mp: 180-182oC, Rf 0.45, IR (ν cm-1) 3307 (OH), 3088 (=C-H), 1661 (C=N), 1636 (C=N), 1589 (C=N), 803 (C-Cl); 1H NMR (400 MHz, CDCl3) δ (ppm): 10.34 (s, OH), 8.29-8.27 (d, J = 8 Hz, 2H), 8.22-8.19 (m, 3H), 8.10 (s, 1H), 7.69-7.66 (m, 3H), 7.54-7.51 (m, 3H) 2.43 (s, 3H); 13C NMR (100 MHz, CDCl3) 169.95, 164.19, 164.14, 157.99, 148.77, 148.87, 136.30, 135.31, 134.87, 131.52, 128.91, 128.69, 128.57, 128.33, 124.96, 106.74, 25.00; MS (+ESI): m/z 498.85 (M+H)+

### (Z)-4-(4-bromophenyl)-6-(4-chlorophenyl)-N-(1-(4-nitrophenyl)ethylidene)pyrimidin-2-amine (5f) Off-white solid, yield: 37.8%, mp: 182-184oC, Rf 0.52, IR (ν cm-1) 3064 (=C-H), 1673 (C=N), 1661 (C=N), 1631 (C=N) 1593 (C=N), 824 (C-Cl); 1H NMR (400 MHz, CDCl3) δ (ppm): 8.36-8.34 (d, J = 8 Hz, 2H), 8.29-8.26 (m, 3H), 8.23-8.21 (d, J = 8 Hz, 1H), 8.17-8.15 (d, J = 8 Hz, 1H), 7.73-7.71 (d, J = 8 Hz, 2H), 7.68-7.66 (m, 1H), 7.59-7.57 (d, J = 8 Hz, 1H), 7.53-7.51 (d, J = 8 Hz, 1H) 2.37 (s, 3H); 13C NMR (100 MHz, CDCl3) δ (ppm) 169.49, 164.11, 164.05, 158.08, 136.16, 135.97, 135.41, 135.01, 131.63, 131.37, 129.18, 128.97, 128.83, 128.68, 128.58, 128.44, 124.96, 106.96, 25.04; MS (+ESI): m/z 530.99 (M+Na)+

### (Z)-4-(4-bromophenyl)-N-(4-chlorobenzylidene)-6-(4-chlorophenyl)pyrimidin-2-amine (5g) Off-white solid, yield: 42.6%, mp: 183-185oC, Rf 0.37; IR (ν cm-1) 3192 (=C-H), 1669 (C=N), 1662 (C=N), 1633 (C=N), 1582 (C=N) 819 (C-Br); 1H NMR (400 MHz, CDCl3) δ (ppm): 8.34-8.31 (m, 3H), 8.27-8.25 (d, J = 8 Hz, 2H), 8.20-8.18 (m, 2H), 8.14-8.12 (m, 1H), 7.71-7.69 (d, J = 8 Hz, 2H), 7.66-7.63 (m, 1H), 7.56-7.54 (d, J = 8 Hz, 2H), 7.51-7.49 (d, J = 8 Hz, 1H); 13C NMR (100 MHz, CDCl3) δ (ppm): 169.37, 164.15, 164.09, 158.06, 136.22, 135.38, 134.96, 131.57, 131.33, 129.08, 128.86, 128.73, 128.63, 128.48, 128.38, 128.24, 124.95, 106.86; MS (+ESI): m/z 485.50 (M+H)+

### (Z)-4-(4-bromophenyl)-N-(1-(4-bromophenyl)ethylidene)-6-(4-chlorophenyl)pyrimidin-2-amine (5h) White solid, yield: 31.2%, mp: 180-182oC, Rf 0.34, IR (ν cm-1) 2922 (=C-H), 1667 (C=N), 1660 (C=N), 1636 (C=N), 1589 (C=N), 819 (C-Br), 1H NMR (400 MHz, CDCl3) δ (ppm): 8.23-8.21 (d, J = 8 Hz, 2H), 8.16-8.14 (d, J = 8 Hz, 2H), 8.06 (s, 1H), 7.97-7.93 (m, 2H), 7.64-7.58 (m, 3H), 7.49-7.43 (m, 3H), ; 13C NMR (100 MHz, CDCl3) δ (ppm): 169.34, 164.12, 164.03, 158.14, 136.26, 136.14, 135.43, 135.21, 131.73, 131.26, 129.10, 128.93, 128.87, 128.69, 128.63, 128.57, 124.86, 106.96, 25.14; MS (+ESI): m/z 573.91 (M+Na)+

### (Z)-2-(1-((4-(4-bromophenyl)-6-(4-chlorophenyl)pyrimidin-2-yl)imino)ethyl)benzene-1,3,5-triol (5i) White solid, yield: 42.5%, mp: 176-178oC, Rf 0.38, IR (ν cm-1) 3309 (OH), 2921 (=C-H), 1673 (C=N), 1661 (C=N), 1631 (C=N), 1593 (C=N), 822 (C-Br), 1H NMR (400 MHz, CDCl3) δ (ppm): 10.44 (s, OH), 8.32-8.30 (d, J = 8 Hz, 2H), 8.25-8.23 (d, J = 8 Hz, 2H), 8.13-8.09 (m, 1H), 7.70-7.68 (d, J = 8 Hz, 2H), 7.65-7.61 (m, 1H) 7.55-7.53 (d, J = 8 Hz, 2H) 2.40 (s, 3H); 13C NMR (100 MHz, CDCl3) 169.78, 164.16, 164.10, 163.89, 163.77, 158.03, 136.31, 136.25, 135.88, 135.45, 135.35, 134.93, 131.54, 131.30, 129.01, 128.80, 128.67, 128.59, 128.42, 124.95, 106.74, 101.65, 25.02; MS (+ESI): m/z 515.49 (M+Li)+

**Compound 5a:**

1. **1H NMR**

1. **13C NMR**

1. **MASS**

**Compound 5b:**

1. **1H NMR**

1. **13C NMR**

1. **MASS**

**Compound 5c:**

1. **1H NMR**

1. **13C NMR**

1. **MASS**

**Compound 5d:**

1. **1H NMR**

1. **13C NMR**

1. **MASS**

**Compound 5e:**

1. **1H NMR**

1. **13C NMR**

1. **MASS**

**Compound 5f:**

1. **1H NMR**

1. **13C NMR**

1. **MASS**

**Compound 5g:**

1. **1H NMR**

1. **13C NMR**

1. **MASS**

**Compound 5h:**

1. **1H NMR**

1. **13C NMR**

1. **MASS**

**Compound 5i:**

1. **1H NMR**

1. **13C NMR**

1. **MASS**

**In-vitro data:**

**Compound 5a: 1. cMET**

**
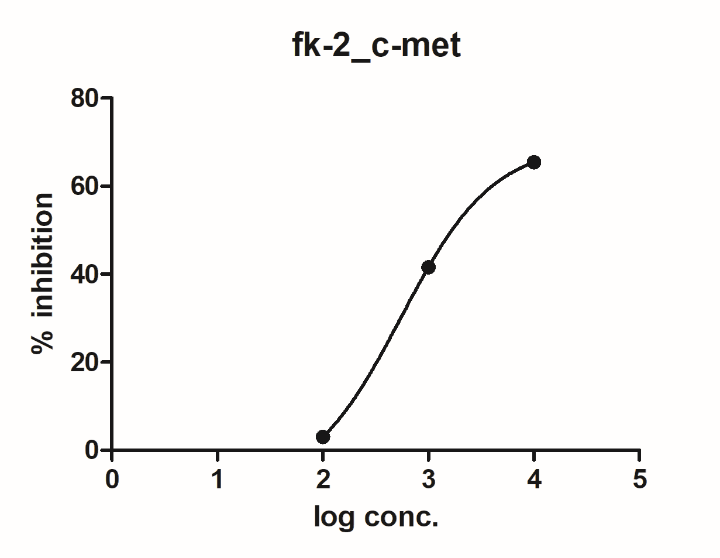
**

**2. EGFR (L858R)**

**
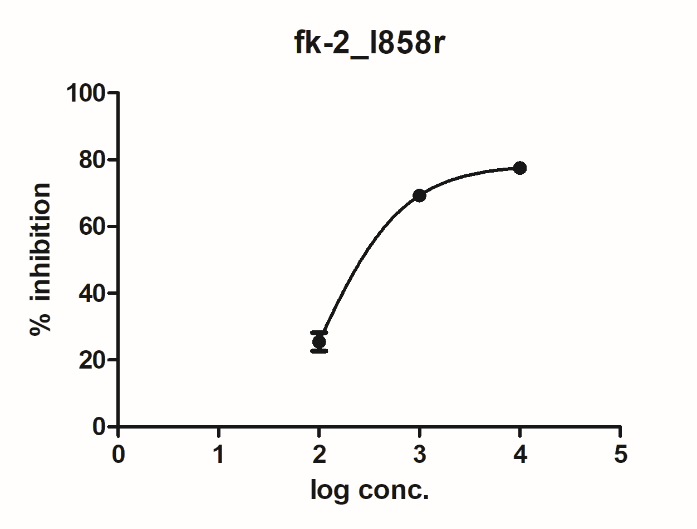
**

**3. EGFR (T790M)**

**
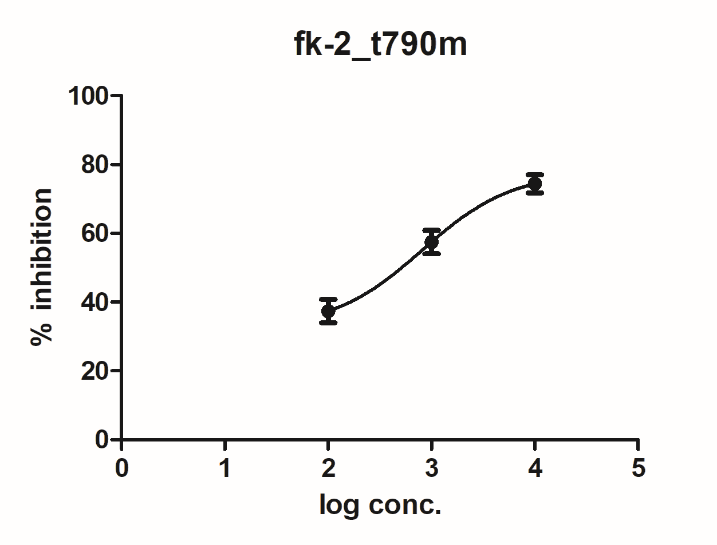
**

**Compound 5b: 1. cMET**

**
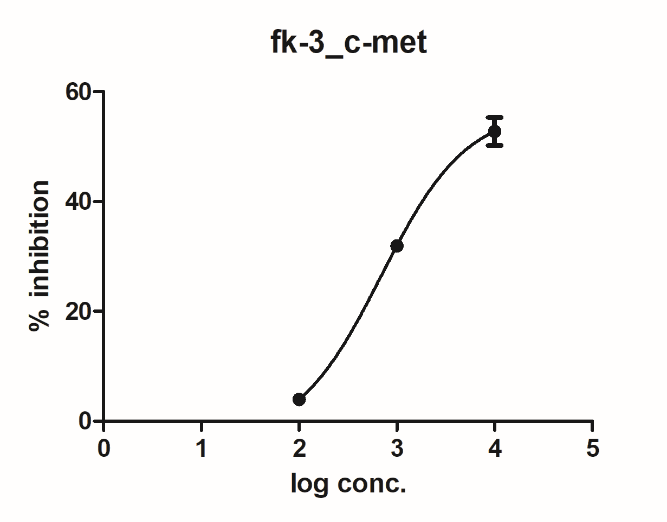
**

**2. EGFR (L858R)**

**
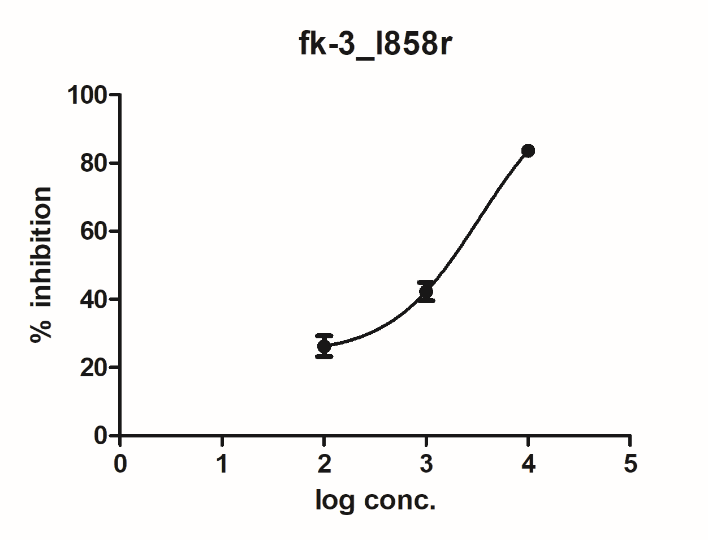
**

**3. EGFR (T790M)**

**
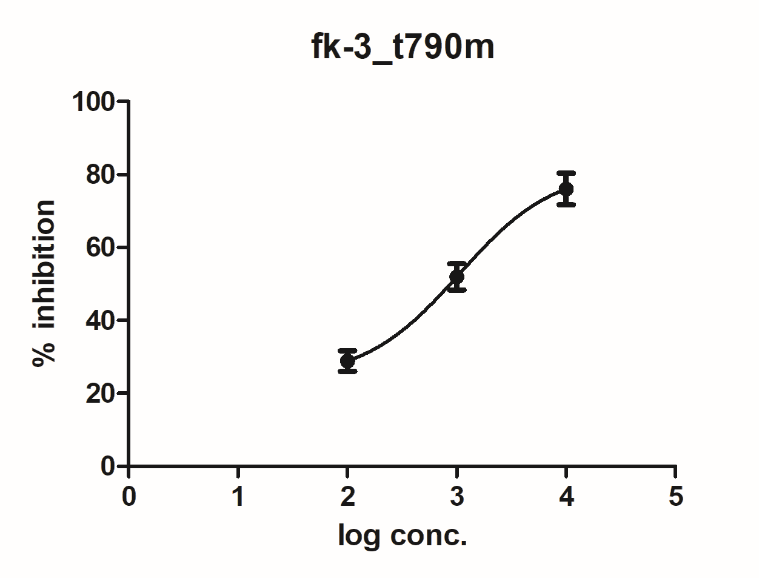
**

**Compound 5c: 1. cMET**

**
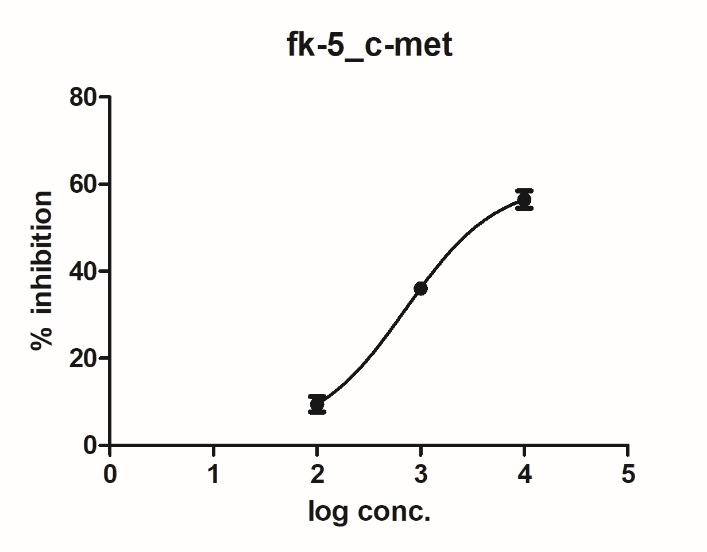
**

**2. EGFR (L858R)**

**
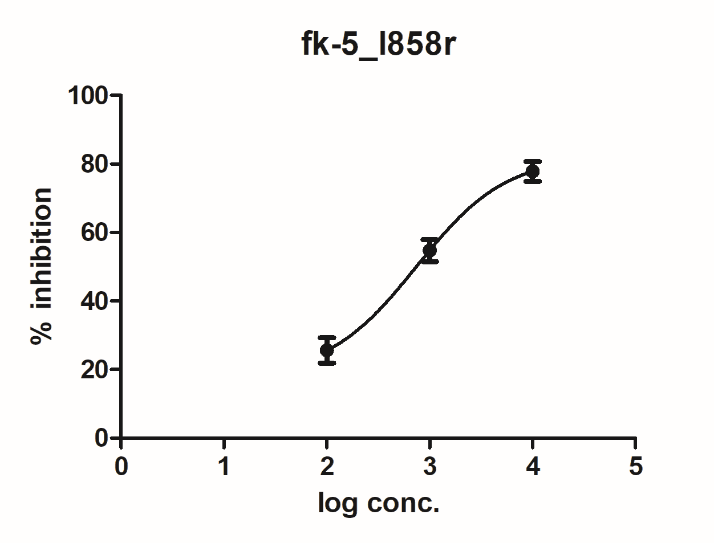
**

**3. EGFR (T790M)**

**
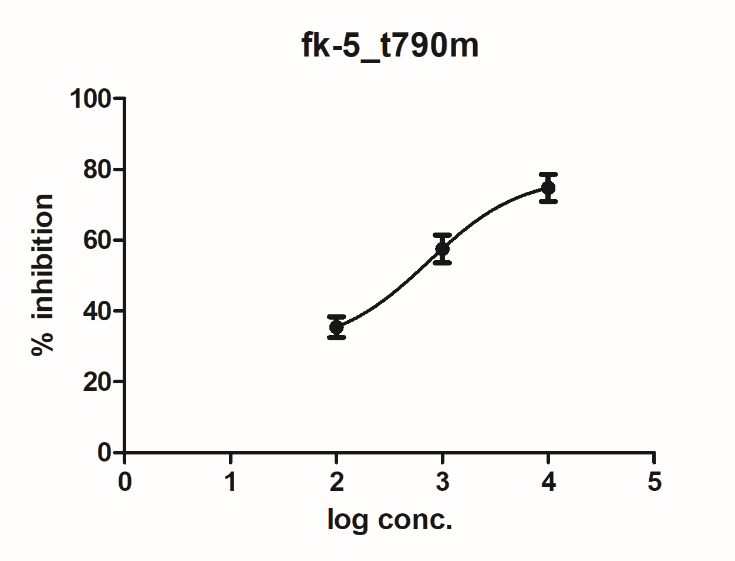
**

**Compound 5d: 1. cMET**

**
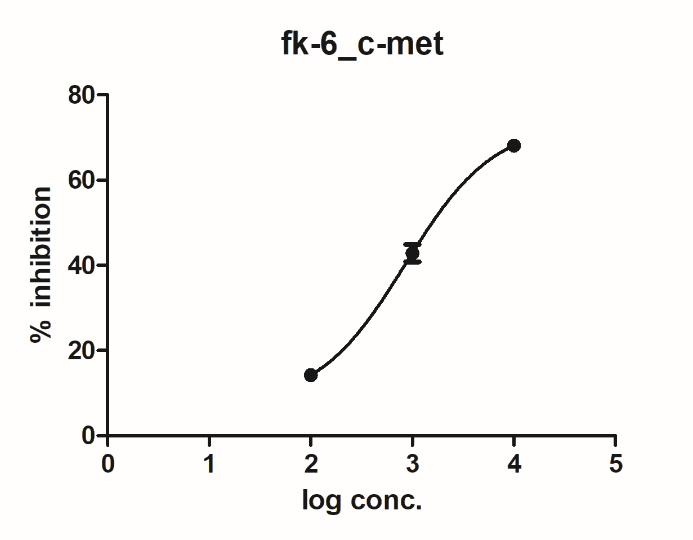
**

**2. EGFR (L858R)**

**
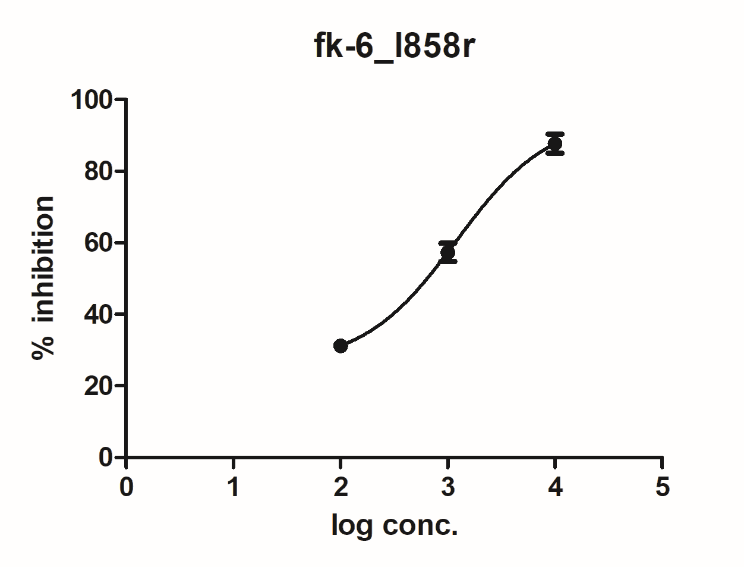
**

**3. EGFR (T790M)**

**
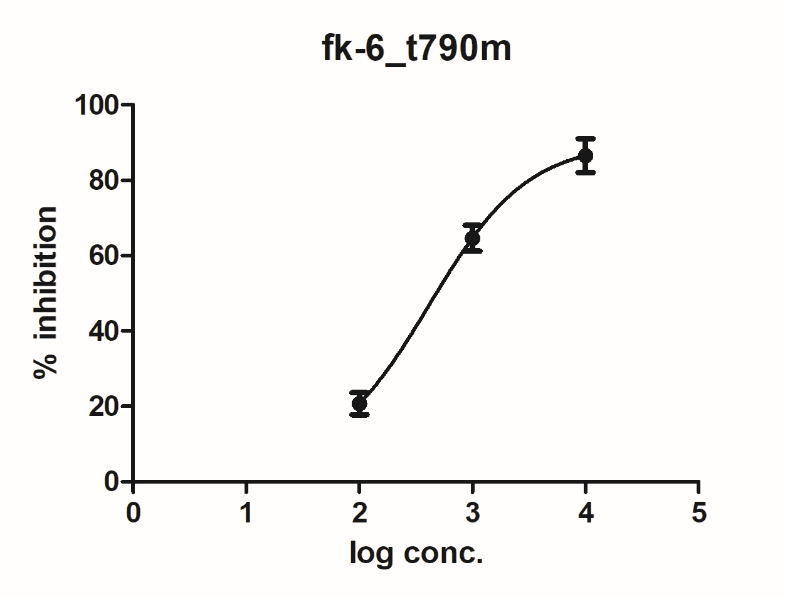
**

**Compound 5e: 1. cMET**

**
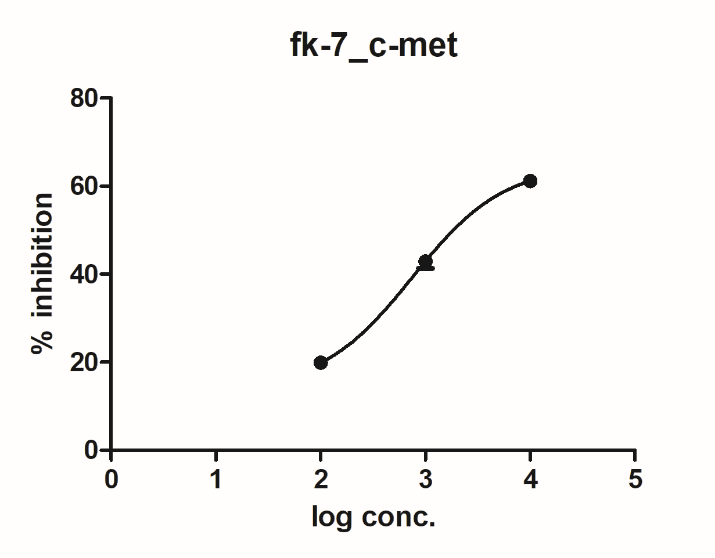
**

**2. EGFR (L858R)**

**
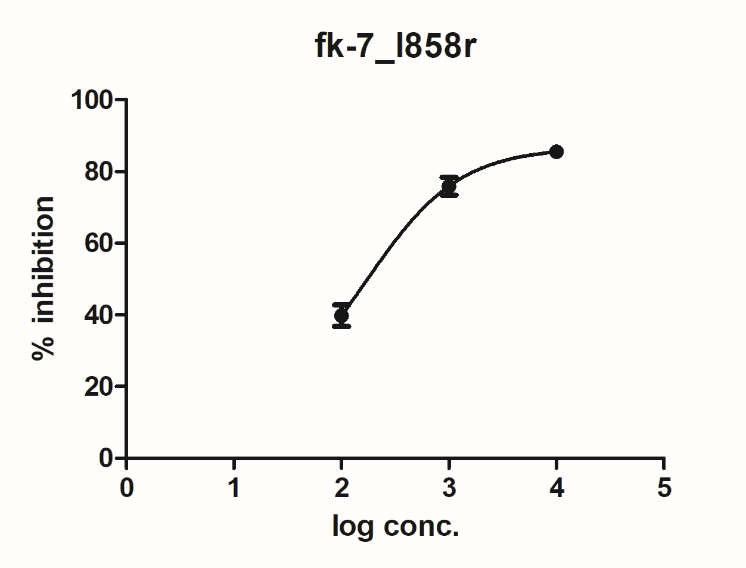
**

**3. EGFR (T790M)**


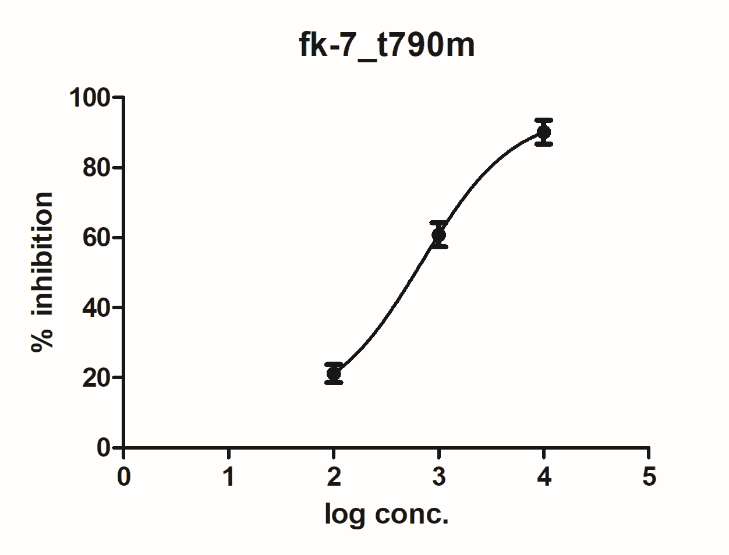


**Compound 5f: 1. cMET**

**
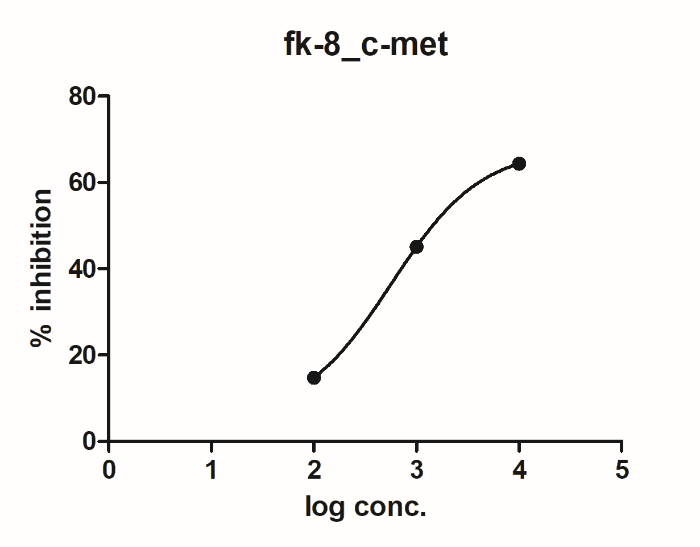
**

**2. EGFR (L858R)**

**
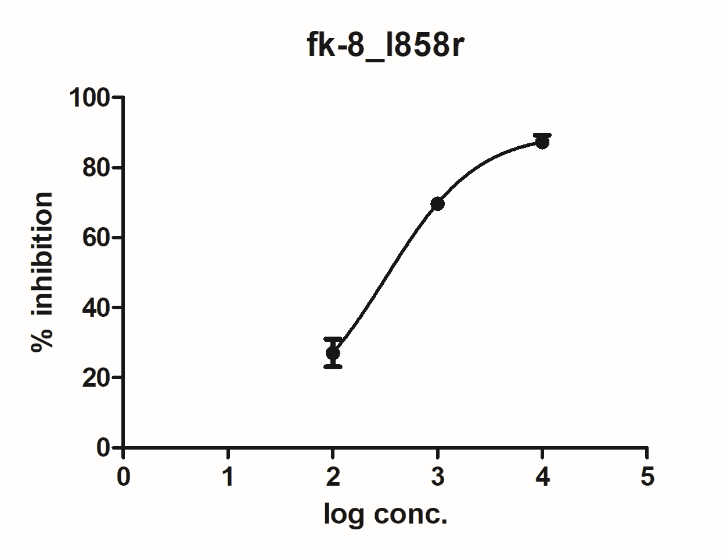
**

**3. EGFR (T790M)**


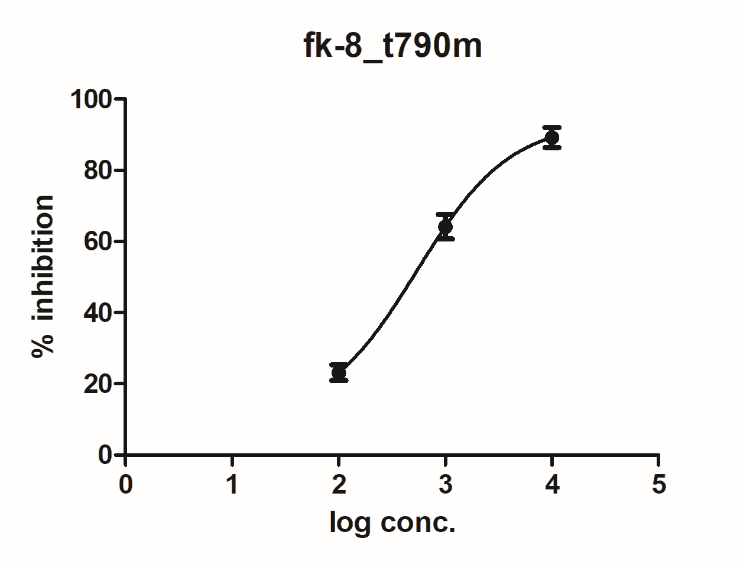


**Compound 5g: 1. cMET**

**
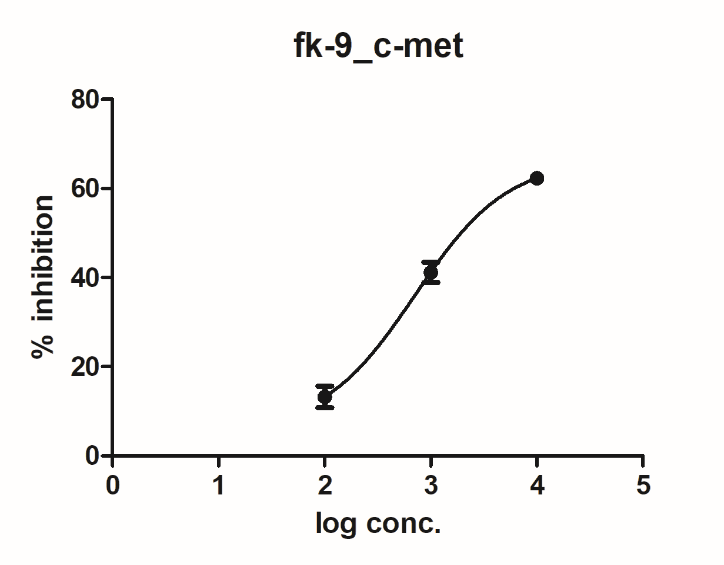
**

**2. EGFR (L858R)**

**
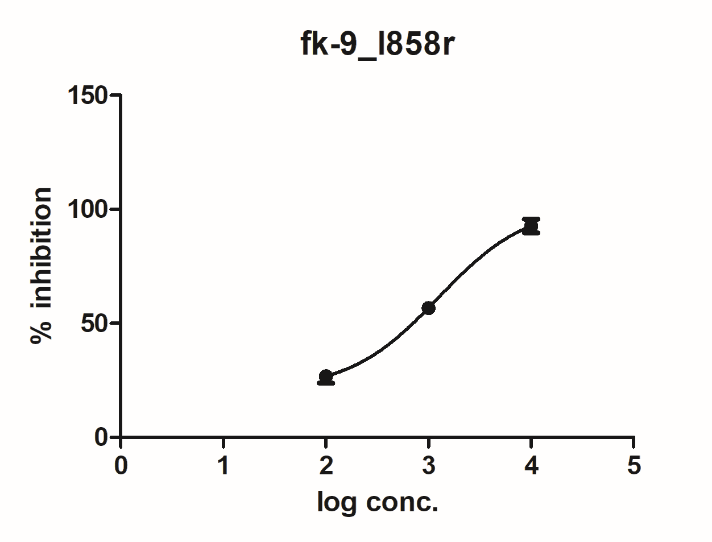
**

**3. EGFR (T790M)**


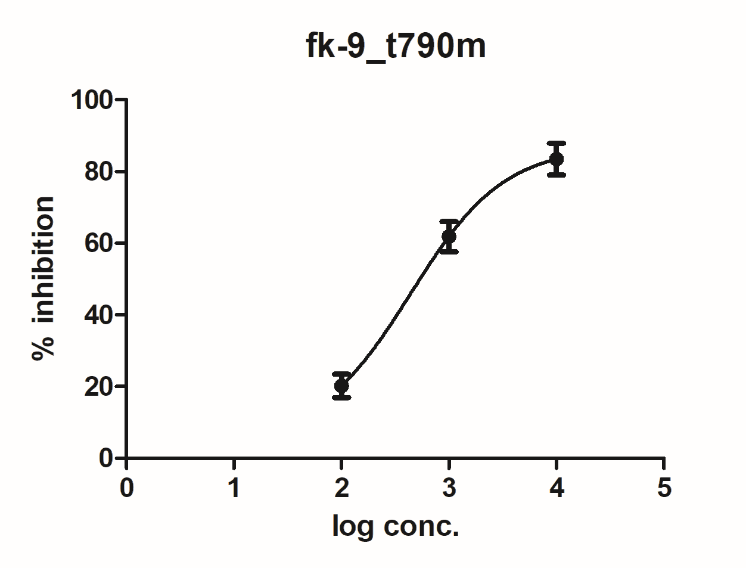


**Compound 5h: 1. cMET**

**
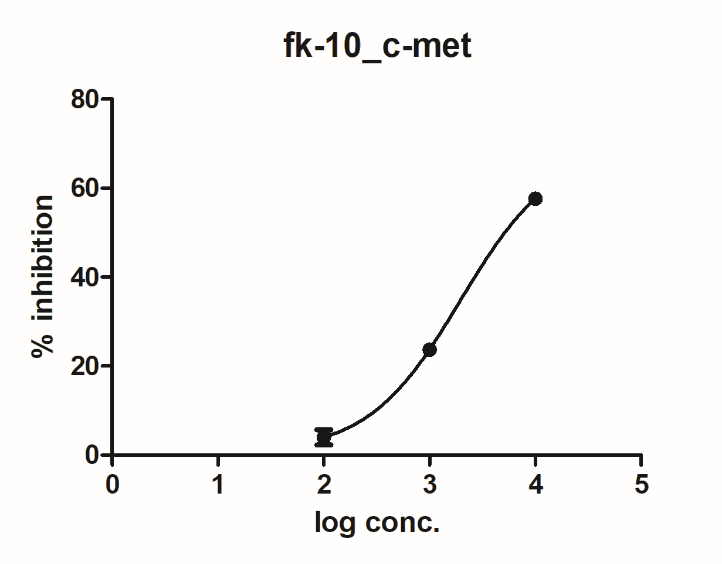
**

**2. EGFR (L858R)**

**
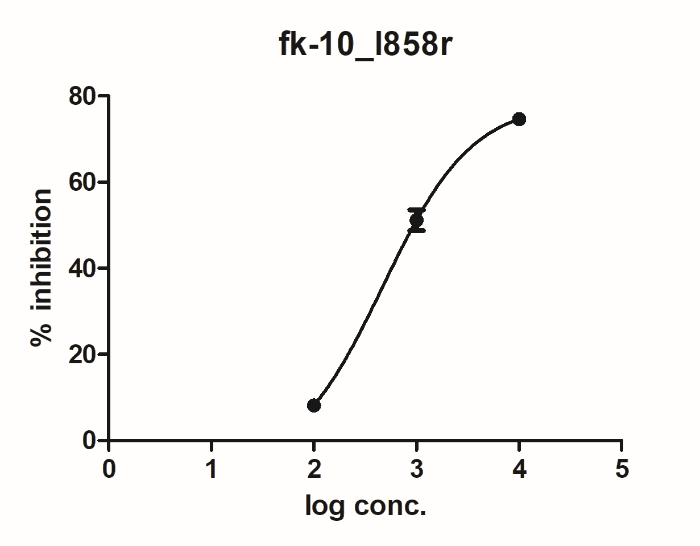
**

**3. EGFR (T790M)**


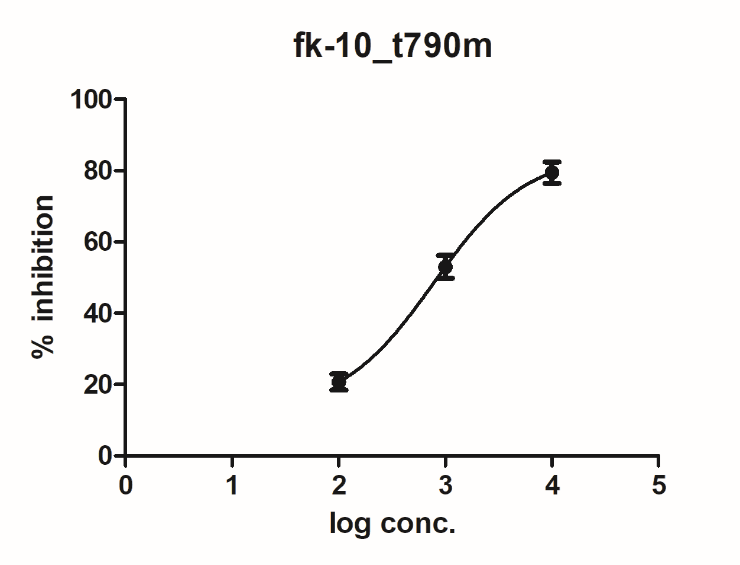


**Compound 5i: 1. cMET**

**
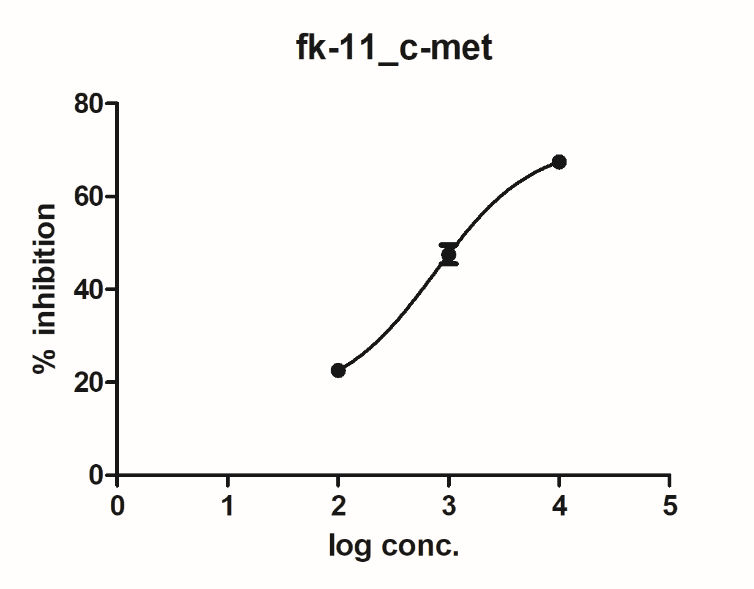
**

**2. EGFR (L858R)**

**
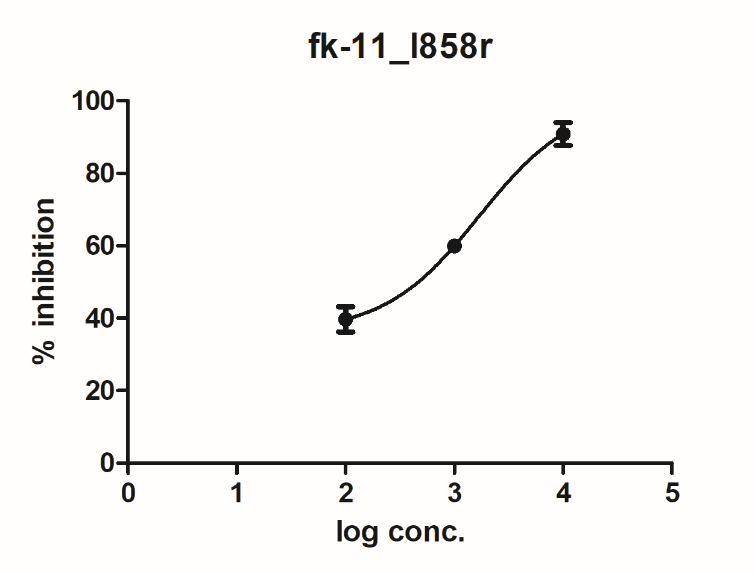
**

**3. EGFR (T790M)**


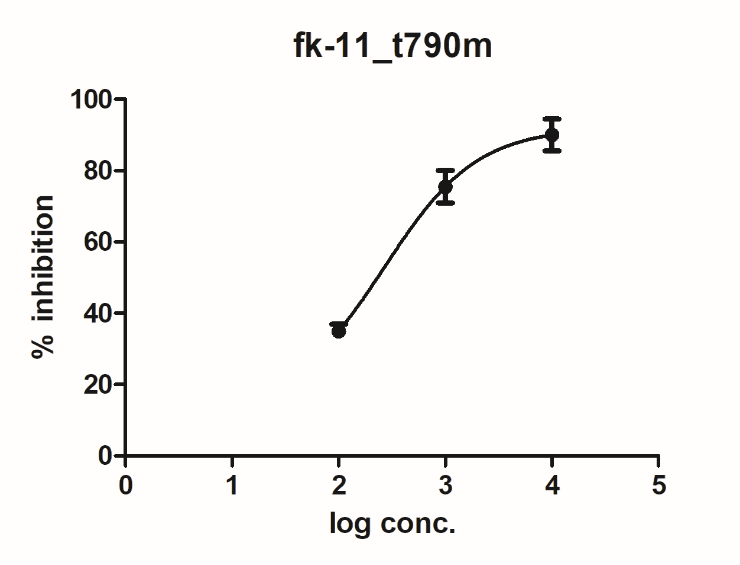

Supplement: Supplementary file 1 [file 12525473]
